# Supplementary material
Source: ML conference proceedings conference paper supplement (https://proceedings.mlr.press/v97/schein19a.html)
Supplement: Supplementary file 1 [file schein19a-supp.pdf]

---

# Appendix for Locally Private Bayesian Inference for Count Models

---

Aaron Schein<sup>1</sup> Zhiwei Steven Wu<sup>2</sup> Alexandra Schofield<sup>3</sup> Mingyuan Zhou<sup>4</sup> Hanna Wallach<sup>5</sup>

## 1. Supplementary results

### 1.1. Community detection $C \in \{5, 10, 20\}$ results

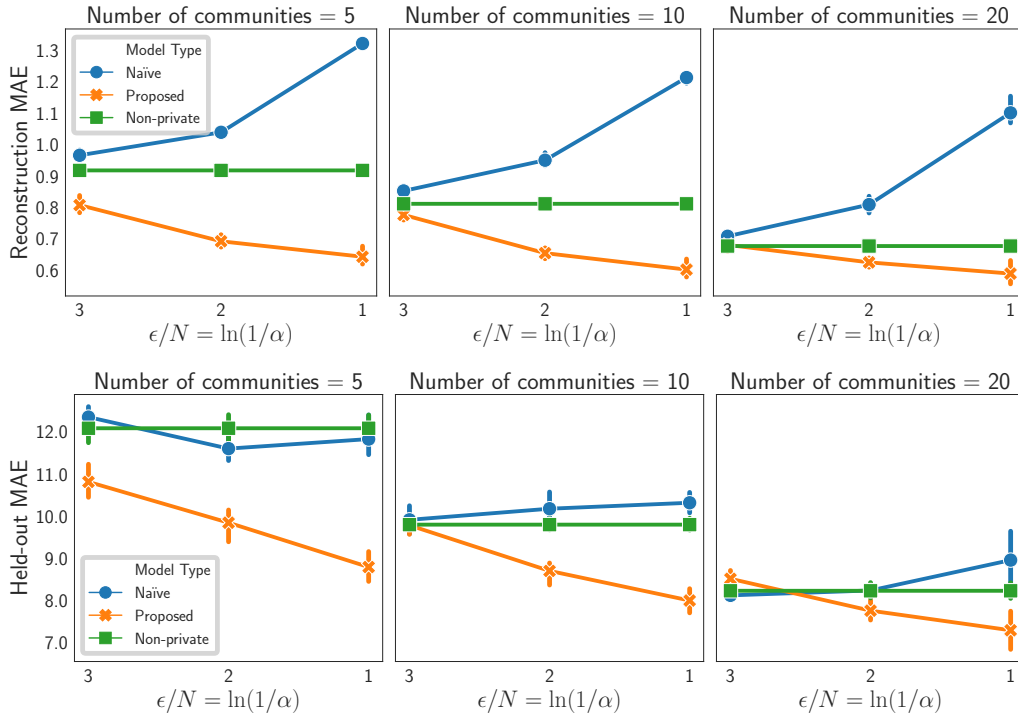

Figure 1. Each subplot compares our method to the two reference methods for increasing levels of privacy. The top subplots depict reconstruction error (lower values are better); the bottom subplots depict held-out reconstruction error (lower values are better).

## 2. Proof of geometric mechanism as LPLP mechanism

**Theorem 1.** Let randomized response method  $\mathcal{R}(\cdot)$  be the geometric mechanism with parameter  $\alpha$ . Then for any positive integer  $N$ , and any pair of observations  $y, y' \in \mathcal{Y}$  such that  $\|y - y'\|_1 \leq N$ ,  $\mathcal{R}(\cdot)$  satisfies

$$P(\mathcal{R}(y) \in \mathcal{S}) \leq e^\epsilon P(\mathcal{R}(y') \in \mathcal{S}) \quad (1)$$

for all subsets  $\mathcal{S}$  in the range of  $\mathcal{R}(\cdot)$ , where

$$\epsilon = N \ln\left(\frac{1}{\alpha}\right). \quad (2)$$

Therefore, for any positive integer  $N$ , the geometric mechanism with parameter  $\alpha$  is an  $(N, \epsilon)$ -private randomized response method with  $\epsilon = N \ln(\frac{1}{\alpha})$ . If  $\frac{\epsilon'}{N'} = \frac{\epsilon}{N}$ , then the geometric mechanism with parameter  $\alpha$  is also  $(N', \epsilon')$ -private.

*Proof.* It suffices to show that for any integer-valued vector  $o \in \mathbb{Z}^d$ , the following inequality holds for any pair of

observations  $y, y' \in \mathcal{Y} \subseteq \mathbb{Z}^d$  such that  $\|y - y'\|_1 \leq N$ :

$$\exp(-\epsilon) \leq \frac{P(\mathcal{R}(y) = o)}{P(\mathcal{R}(y') = o)} \leq \exp(\epsilon), \quad (3)$$

where  $\epsilon = N \ln\left(\frac{1}{\alpha}\right)$ .

Let  $\nu$  denote a  $d$ -dimensional noise vector with elements drawn independently from  $2\text{Geo}(\alpha)$ . Then,

$$\frac{P(\mathcal{R}(y) = o)}{P(\mathcal{R}(y') = o)} = \frac{P(\nu = o - y)}{P(\nu = o - y')} \quad (4)$$

$$= \frac{\prod_{i=1}^d \frac{1-\alpha}{1+\alpha} \alpha^{|o_i - y_i|}}{\prod_{i=1}^d \frac{1-\alpha}{1+\alpha} \alpha^{|o_i - y'_i|}} \quad (5)$$

$$= \alpha^{(\sum_{i=1}^d |o_i - y_i| - |o_i - y'_i|)}. \quad (6)$$

By the triangle inequality, we also know that for each  $i$ ,

$$-|y_i - y'_i| \leq |o_i - y_i| - |o_i - y'_i| \leq |y_i - y'_i|. \quad (7)$$

Therefore,

$$-\|y - y'\|_1 \leq \sum_{i=1}^d (|o_i - y_i| - |o_i - y'_i|) \leq \|y - y'\|_1. \quad (8)$$

It follows that

$$\alpha^{-N} \leq \frac{P(\mathcal{R}(y) = o)}{P(\mathcal{R}(y') = o)} \leq \alpha^N. \quad (9)$$

If  $\epsilon = N \ln\left(\frac{1}{\alpha}\right)$ , then we recover the bound in equation 3.  $\square$

### 3. Proof of two-sided geometric noise as exponentially-randomized Skellam noise

**Theorem 2.** A two-sided geometric random variable  $\tau \sim 2\text{Geo}(\alpha)$  can be generated as follows:

$$\tau \sim \text{Skel}(\lambda^{(+)}, \lambda^{(-)}), \quad \lambda^{(*)} \sim \text{Exp}\left(\frac{\alpha}{1-\alpha}\right), \quad (10)$$

where  $\text{Exp}(\cdot)$  and  $\text{Skel}(\cdot)$  are the exponential and Skellam distributions. The latter is the marginal distribution of the difference  $\tau := g^{(+)} - g^{(-)}$  of two independent Poisson random variables  $g^{(*)} \sim \text{Pois}(\lambda^{(*)})$ , where  $* \in \{+, -\}$ .

*Proof.* A two-sided geometric random variable  $\tau \sim 2\text{Geo}(\alpha)$  can be generated by taking the difference of two independent and identically distributed geometric random variables:<sup>1</sup>

$$g^{(+)} \sim \text{Geo}(\alpha), \quad g^{(-)} \sim \text{Geo}(\alpha), \quad \tau := g^{(+)} - g^{(-)}. \quad (11)$$

The geometric distribution is a special case of the negative binomial distribution, with shape parameter equal to one (Johnson et al., 2005). Furthermore, the negative binomial distribution can be represented as a mixture of Poisson distributions with a gamma mixing distribution. We can therefore re-express equation 11 as follows:

$$\lambda^{(+)} \sim \text{Gam}\left(1, \frac{\alpha}{1-\alpha}\right), \quad \lambda^{(-)} \sim \text{Gam}\left(1, \frac{\alpha}{1-\alpha}\right), \quad g^{(+)} \sim \text{Pois}(\lambda^{(+)}) , \quad g^{(-)} \sim \text{Pois}(\lambda^{(-)}), \quad \tau := g^{(+)} - g^{(-)}. \quad (12)$$

Finally, a gamma distribution with shape parameter equal to one is an exponential distribution, while the signed difference of two independent Poisson random variables is marginally a Skellam random variable (Skellam, 1946). We therefore recover the generative process in equation 10. We visualize the Skellam and two-sided geometric distributions in figure 2.  $\square$

<sup>1</sup>A video of Unnikrishna Pillai deriving this is available at <https://www.youtube.com/watch?v=V1EyqL1cqTE>.

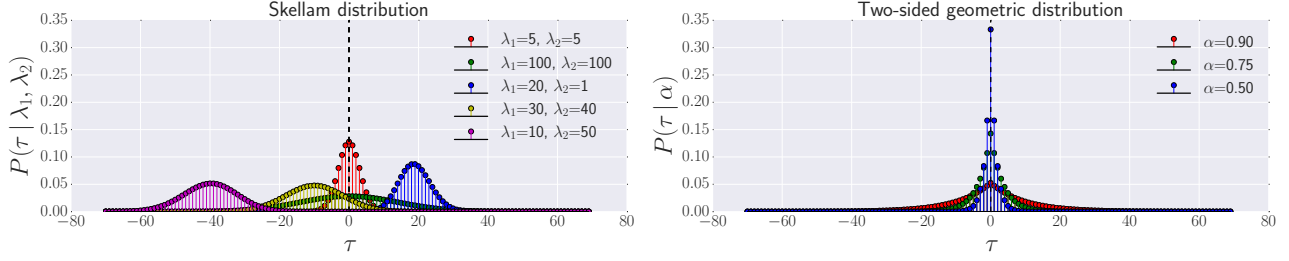

Figure 2. The two-sided geometric distribution (right) can be obtained by randomizing the parameters of the Skellam distribution (left). With fixed parameters, the Skellam distribution can be asymmetric and centered at a value other than zero; however, the two-sided geometric distribution is symmetric and centered at zero. It is also heavy tailed and the discrete analog of the Laplace distribution.

#### 4. Proof of relationship between the Bessel and Skellam distributions

**Theorem 3.** Consider two Poisson random variables  $y_1 \sim \text{Pois}(\lambda^{(+)})$  and  $y_2 \sim \text{Pois}(\lambda^{(-)})$ . Their minimum  $m := \min\{y_1, y_2\}$  and their difference  $\tau := y_1 - y_2$  are deterministic functions of  $y_1$  and  $y_2$ . However, if not conditioned on  $y_1$  and  $y_2$ , the random variables  $m$  and  $\tau$  can be marginally generated as follows:

$$\tau \sim \text{Skel}(\lambda^{(+)}, \lambda^{(-)}), m \sim \text{Bes}\left(|\tau|, 2\sqrt{\lambda^{(+)}\lambda^{(-)}}\right). \quad (13)$$

*Proof.* We begin by writing out the raw joint probability of  $y_1$  and  $y_2$ :

$$P(y_1, y_2) = \text{Pois}(y_1; \lambda^{(+)}) \text{Pois}(y_2; \lambda^{(-)}) \quad (14)$$

$$= \frac{(\lambda^{(+)})^{y_1}}{y_1!} e^{-\lambda^{(+)}} \frac{(\lambda^{(-)})^{y_2}}{y_2!} e^{-\lambda^{(-)}} \quad (15)$$

$$= \frac{(\sqrt{\lambda^{(+)}\lambda^{(-)}})^{y_1+y_2}}{y_1! y_2!} e^{-(\lambda^{(+)}+\lambda^{(-)})} \left(\frac{\lambda^{(+)}}{\lambda^{(-)}}\right)^{(y_1-y_2)/2}. \quad (16)$$

If  $y_1 \geq y_2$ , then

$$P(y_1, y_2) = \frac{(\sqrt{\lambda^{(+)}\lambda^{(-)}})^{y_1+y_2}}{I_{y_1-y_2}(2\sqrt{\lambda^{(+)}\lambda^{(-)}}) y_1! y_2!} e^{-(\lambda^{(+)}+\lambda^{(-)})} \left(\frac{\lambda^{(+)}}{\lambda^{(-)}}\right)^{(y_1-y_2)/2} I_{y_1-y_2}(2\sqrt{\lambda^{(+)}\lambda^{(-)}}) \quad (17)$$

$$= \text{Bes}\left(y_2; y_1 - y_2, 2\sqrt{\lambda^{(+)}\lambda^{(-)}}\right) \text{Skel}(y_1 - y_2; \lambda^{(+)}, \lambda^{(-)}); \quad (18)$$

otherwise

$$P(y_1, y_2) = \frac{(\sqrt{\lambda^{(+)}\lambda^{(-)}})^{y_1+y_2}}{I_{y_2-y_1}(2\sqrt{\lambda^{(+)}\lambda^{(-)}}) y_1! y_2!} e^{-(\lambda^{(+)}+\lambda^{(-)})} \left(\frac{\lambda^{(-)}}{\lambda^{(+)}}\right)^{(y_2-y_1)/2} I_{y_2-y_1}(2\sqrt{\lambda^{(+)}\lambda^{(-)}}) \quad (19)$$

$$= \text{Bes}\left(y_1; y_2 - y_1, 2\sqrt{\lambda^{(+)}\lambda^{(-)}}\right) \text{Skel}(y_2 - y_1; \lambda^{(-)}, \lambda^{(+)})$$

$$= \text{Bes}\left(y_1; -(y_1 - y_2), 2\sqrt{\lambda^{(+)}\lambda^{(-)}}\right) \text{Skel}(y_1 - y_2; \lambda^{(+)}, \lambda^{(-)}). \quad (20)$$

If

$$m := \min\{y_1, y_2\}, \quad \tau := y_1 - y_2, \quad (21)$$

then we can change variables using the deterministic relationships

$$y_2 = m, \quad y_1 = m + \tau \quad \text{if } \tau \geq 0 \quad (22)$$

$$y_1 = m, \quad y_2 = m - \tau \quad \text{otherwise.} \quad (23)$$

The Jacobean can be computed as

$$\begin{vmatrix} \frac{\partial y_1}{\partial m} & \frac{\partial y_1}{\partial \tau} \\ \frac{\partial y_2}{\partial m} & \frac{\partial y_2}{\partial \tau} \end{vmatrix} = \begin{vmatrix} 1 & 1 \\ 1 & 0 \end{vmatrix}^{\tau \geq 0} \begin{vmatrix} 1 & 0 \\ 1 & -1 \end{vmatrix}^{\tau < 0} = 1, \quad (24)$$

so

$$\begin{aligned} P(m, \tau) &= P(y_1, y_2) \begin{vmatrix} \frac{\partial y_1}{\partial m} & \frac{\partial y_1}{\partial \tau} \\ \frac{\partial y_2}{\partial m} & \frac{\partial y_2}{\partial \tau} \end{vmatrix} \\ &= \text{Bes} \left( m; |\tau|, 2\sqrt{\lambda^{(+)}\lambda^{(-)}} \right) \text{Skel}(\tau; \lambda^{(+)}, \lambda^{(-)}). \end{aligned} \quad (25)$$

□

## References

Johnson, N. L., Kemp, A. W., and Kotz, S. *Univariate discrete distributions*. 2005.

Skellam, J. G. The frequency distribution of the difference between two Poisson variates belonging to different populations. *Journal of the Royal Statistical Society, Series A (General)*, 109:296, 1946.
